# Supplementary material
Source: ML conference proceedings conference paper supplement (https://proceedings.neurips.cc/paper_files/paper/2022/hash/33201f38001dd381aba2c462051449ba-Abstract.html)
Supplement: Supplementary file 1 [file 33201f38001dd381aba2c462051449ba-Supplemental-Conference.zip]

Archive with 4 entries (4 files):
- paper_with_appendix.pdf
- __MACOSX/._paper_with_appendix.pdf
- appendix_only.pdf
- __MACOSX/._appendix_only.pdf
